# Supplementary material for: A cyclometallated iridium(iii) complex with multi-photon absorption properties as an imaging-guided photosensitizer
Source: Royal Society of Chemistry journal article supplement (doi:10.1039/d2tb01023b), 2022-01-01
Supplement: d2tb01023b1.pdf [file d2tb01023b1.pdf]

## **A Cyclometallated Iridium(III) Complex with Multi-photon Absorption Properties as an Imaging-Guided Photosensitizer**

Dandan Chen,<sup>a, 1</sup> Hongqing Zhao,<sup>b, 1</sup> Tao Shao,<sup>c, 1</sup> Xin Lu,<sup>d</sup> Zhiyun Fang,<sup>d</sup> HongZhi Cao,<sup>e</sup> Yupeng Tian,<sup>d</sup> and Xiaohe Tian.<sup>a, e, \*</sup>

*<sup>a</sup> School of Life Science, Anhui University, Hefei 230601, P. R. China*

*<sup>b</sup> Institutes of Physical Science and Information Technology, Anhui University, Hefei 230601, P. R. China*

*<sup>c</sup> Frontiers Science Center for Flexible Electronics, Xi'an Institute of Flexible Electronics (IFE) and Xi'an Institute of Biomedical Materials&Engineering, Northwestern Polytechnical University, P. R. China*

*<sup>d</sup> College of Chemistry and Chemical Engineering, Anhui University, Hefei, 230601, P.R. China*

*<sup>e</sup> Huaxi MR Research Centre (HMRRC), Functional and Molecular Imaging Key Laboratory of Sichuan Province, Department of Radiology and National Clinical Research Center for Geriatrics, West China Hospital of Sichuan University, Chengdu 610000, P.R. China*

<sup>1</sup> These authors contributed equally to this work and should be considered as co-first authors

\* Corresponding author: xiaohe.t@wchscu.cn (X. Tian)

---

## Table of contents

|                                                                                                                                              |    |
|----------------------------------------------------------------------------------------------------------------------------------------------|----|
| Experimental and methods .....                                                                                                               | 4  |
| Materials and apparatus .....                                                                                                                | 4  |
| Two-photon excited fluorescence (2PEF) spectroscopy and two-photon absorption (2PA) cross-section .....                                      | 4  |
| Three-photon excited fluorescence (3PEF) spectroscopy and three-photon absorption (3PA) cross-section .....                                  | 4  |
| ROS generation detection .....                                                                                                               | 5  |
| Electron spin resonance (ESR) assay .....                                                                                                    | 5  |
| Singlet oxygen ( $^1\text{O}_2$ ) generation detection .....                                                                                 | 5  |
| Cell culture.....                                                                                                                            | 6  |
| Cytotoxicity assay .....                                                                                                                     | 6  |
| Mitochondrial co-localization assays .....                                                                                                   | 6  |
| Cell uptake analysis .....                                                                                                                   | 7  |
| ROS generation under two-photon laser <i>in vitro</i> .....                                                                                  | 7  |
| The species of ROS generation under two-photon laser <i>in vitro</i> .....                                                                   | 8  |
| Flow cytometry study .....                                                                                                                   | 8  |
| Live/Dead assay with calcein AM/PI.....                                                                                                      | 8  |
| Synthesis .....                                                                                                                              | 9  |
| <br>                                                                                                                                         |    |
| Figure S1 $^1\text{H}$ NMR spectrum (400 MHz, DMSO- $d_6$ ) of <b>CL</b> .....                                                               | 12 |
| Figure S2 Mass spectrum of <b>CL</b> .....                                                                                                   | 12 |
| Figure S3 $^1\text{H}$ NMR spectrum (400 MHz, DMSO- $d_6$ ) of <b>L0</b> .....                                                               | 13 |
| Figure S4 Mass spectrum of <b>L0</b> .....                                                                                                   | 13 |
| Figure S5 $^1\text{H}$ NMR spectrum (400 MHz, $\text{CD}_3\text{CN}$ ) of <b>L-OH</b> .....                                                  | 14 |
| Figure S6 Mass spectrum of <b>L-OH</b> .....                                                                                                 | 14 |
| Figure S7 $^1\text{H}$ NMR spectrum (400 MHz, $\text{CD}_2\text{Cl}_2$ ) of <b>L-Biotin</b> .....                                            | 15 |
| Figure S8 Mass spectrum of <b>L-Biotin</b> .....                                                                                             | 15 |
| Figure S9 $^1\text{H}$ NMR spectrum (400 MHz, $\text{CD}_2\text{Cl}_2$ ) of <b>Ir-Biotin</b> .....                                           | 16 |
| Figure S10 $^{13}\text{C}$ NMR spectrum (600 MHz, DMSO- $d_6$ ) of <b>Ir-Biotin</b> .....                                                    | 16 |
| Figure S11 Mass spectrum of <b>Ir-Biotin</b> .....                                                                                           | 17 |
| Figure S12 UV-Vis absorption and fluorescence spectra of <b>Ir-Biotin</b> in DMSO (excited at 320 nm, $c = 1.0 \times 10^{-5}$ mol/L). ..... | 17 |
| Figure S13 Effects of different solvents (a) and pH (b) on the fluorescence intensity of <b>Ir-Biotin</b> .....                              | 18 |

---

|                                                                                                                                                                                                                                                                                                                                                                                                                                                  |    |
|--------------------------------------------------------------------------------------------------------------------------------------------------------------------------------------------------------------------------------------------------------------------------------------------------------------------------------------------------------------------------------------------------------------------------------------------------|----|
| Figure S14 HOMO and LUMO distributions of <b>Ir-Biotin</b> .....                                                                                                                                                                                                                                                                                                                                                                                 | 18 |
| Figure S15 (a) Two-photon fluorescence intensity of <b>Ir-Biotin</b> in DMSO ( $c = 1 \times 10^{-3}$ mol/L). (b) The square relationship of two-photon excited fluorescence intensity ( $I_{out}$ ) of <b>Ir-Biotin</b> with the addition of input power .....                                                                                                                                                                                  | 19 |
| Figure S16 (a) Three-photon fluorescence intensity of <b>Ir-Biotin</b> in DMSO ( $c = 1 \times 10^{-3}$ mol/L). (b) The square relationship of three-photon excited fluorescence intensity ( $I_{out}$ ) of <b>Ir-Biotin</b> with the addition of input power .....                                                                                                                                                                              | 19 |
| Figure S17 (a) Changes in the DPBF absorption spectrum after 10 s of illumination. (b) Absorption spectra of DPBF irradiated for 10 s in the presence of <b>Ir-Biotin</b> . (c) Absorption spectra of DPBF irradiated for 100 s in the presence of MB. Plot of change in absorbance of DPBF at 418 nm vs irradiation time in the presence of <b>Ir-Biotin</b> (d) and MB (e). (f) Singlet oxygen quantum yields of MB and <b>Ir-Biotin</b> ..... | 20 |
| Figure S18 CLSM images of HeLa cells treated with <b>Ir-Biotin</b> (Concentration: 2 $\mu$ M. Scale bar: 20 $\mu$ m).....                                                                                                                                                                                                                                                                                                                        | 21 |
| Figure S19 Octanol/water partition coefficient of <b>Ir-Biotin</b> .....                                                                                                                                                                                                                                                                                                                                                                         | 21 |
| Figure S20 Comparison of <b>Ir-Biotin</b> uptake in HeLa cells and QSG cells. (*P < 0.05, **P < 0.01, ***P < 0.001 determined by One-way ANOVA).....                                                                                                                                                                                                                                                                                             | 21 |
| Figure S21 Detection of ROS species in HeLa cells using DHE and SOSG as indicators for $O_2^{\cdot-}$ and $^1O_2$ . $NaN_3$ acts as a specific scavenger for $^1O_2$ (Concentration: 2 $\mu$ M. Light: 760 nm laser. irradiation time: 10 min Scale bar: 40 $\mu$ m) .....                                                                                                                                                                       | 22 |
| Figure S22 IC50 value and phototoxicity index (PI) of <b>Ir-Biotin</b> under light and dark .....                                                                                                                                                                                                                                                                                                                                                | 22 |
| Figure S23 Detection dark toxicity and phototoxicity of <b>Ir-Biotin</b> against HepG2 (a) and 4T1 (b) cells.....                                                                                                                                                                                                                                                                                                                                | 23 |
| Figure S24 Laser irradiation 30 S mitochondrial length change (a) and quantization (b) (Concentration: 2 $\mu$ M. Light: 760 nm laser. Scale bar: 10 $\mu$ m. *P < 0.05, **P < 0.01, ***P < 0.001 determined by Student's t-test) .....                                                                                                                                                                                                          | 23 |

---

## Experimental and methods

### Materials and apparatus

All chemicals were obtained commercially and solvents were purified with conventional methods before using. The  $^1\text{H}$  (400 MHz or 600 MHz) NMR spectra were collected on a Bruker Avance 400 spectrometer at 25°C (TMS as internal standard in NMR). Mass Spectrometer was recorded using LTQ Orbitrap XL and Bruker Autoflex III TOF/TOF. UV-vis absorption spectra were recorded on a UV-265 spectrophotometer. Fluorescence measurements were carried out on a Hitachi F-7000 fluorescence spectrophotometer. Quantum yield was determined by FLUORMAX-4P. Confocal microscopy imaging was acquired with a Leica SP8 confocal microscopy and 100/63  $\times$  oil-immersion objective lens. In vivo fluorescence imaging was conducted on IVIS Lumin2 III.

### Two-photon excited fluorescence (2PEF) spectroscopy and two-photon absorption (2PA) cross-section

2PEF spectra were obtained by the two-photon excited fluorescence (2PEF) method with a femtosecond laser pulse and a Ti: sapphire system (680-1080 nm, 80 MHz, 140 fs) as the light source. The reference sample is Rhodamine B with a concentration of  $1.0 \times 10^{-3}$  M in ethanol. The concentration of Ir-Biotin was  $1.0 \times 10^{-3}$  M. 2PA cross-section was calculated by using the following equation:

$$\delta = \delta_{ref} \frac{\Phi_{ref} c_{ref} n_{ref} F}{\Phi c n F_{ref}}$$

Here, ref stand for reference sample,  $\delta$  is the two-photon absorption cross section,  $\Phi$  is quantum yield,  $c$  is the concentration of the sample,  $n$  is refractive index,  $F$  is two-photon fluorescence integral area. The absolute value of the two-photon absorption cross-section of the reference sample is derived from the literature.

### Three-photon excited fluorescence (3PEF) spectroscopy and three-photon absorption (3PA) cross-section

3PEF spectra were obtained by the multi-photon excited fluorescence method with Coherent Astrella+TOPAS Prime (1200-2600 nm, 1 kHz, 120 fs) as the light source. The reference sample is Rhodamine 6G ( $1.0 \times 10^{-3}$  M). The concentration of Ir-Biotin was  $1.0 \times 10^{-3}$  M. The multi-

---

photon absorption cross-section were calculated by using the following equation:

$$\sigma = \frac{\gamma}{N_A \times d_0 \times 10^{-3}} \cdot \left(\frac{hc}{\lambda}\right)^2$$

Here,  $\gamma$  is three photon absorption coefficients,  $\lambda$  is wavelength of incident light,  $N_A$  is the Avogadro constant,  $d_0$  is the concentration of the sample ( $1.0 \times 10^{-3}$  M).

### **ROS generation detection**

DCFH was used as the ROS-monitoring agent. 10  $\mu$ L of DCFH stock solution (1.0 mM) and 5  $\mu$ L of Ir-Biotin (1.0 mM) were added to 2 mL PBS solution, and LED light (400-700 nm, 40 mW/cm<sup>2</sup>) was employed as the light source. The emission of DCFH at 525 nm was recorded under various irradiation times.

### **Electron spin resonance (ESR) assay**

The EPR measurements were carried out with a Bruker Nano X-band spectrometer at 298 K. The spin traps 2,2,6,6-tetramethylpiperidine (TEMP for trapping <sup>1</sup>O<sub>2</sub>) and 5,5-dimethyl-1-pyrroline-N-oxide (DMPO for trapping O<sub>2</sub><sup>-</sup>, OH<sup>-</sup>) were used to verify the formation of reactive oxygen species (ROS) generated by Ir-Biotin. The ESR signals of the Ir-Biotin (5  $\mu$ M) before and after LED light (400-700 nm, 40 mW/cm<sup>2</sup>) irradiation were recorded.

### **Singlet oxygen (<sup>1</sup>O<sub>2</sub>) generation detection**

The singlet oxygen was measured by a singlet oxygen indicator named 1,3-diphenylisobenzofuran (DPBF). Air-equilibrated DMSO solutions containing the Ir-Biotin and DPBF (10 mM) was exposed to LED light (400-700 nm, 40 mW/cm<sup>2</sup>) irradiation for different time. The absorbance of DPBF at 418 nm was recorded every 2 s. Methylene blue (MB) was used as a reference for ROS sensitization ( $\Phi_{\Delta} = 0.52$ ). A DMSO solution of DPBF without the probes was examined to assess its photostability under identical irradiation conditions. The following equation was used for the determination of  $\Phi_{\Delta}$ :

$$\Phi_{\Delta}^{unk} = \Phi_{\Delta}^{ref} \times (m^{unk} \times F^{ref}) / (m^{ref} \times F^{unk})$$

where  $m$  is the slope of a linear fit of the change of absorbance at 418 nm against the irradiation

---

time (s) and F is the absorption correction factor, which is given by  $F = 1 - 10^{-AF}$  (A = absorbance at 365 nm and L = path length of the cell).

### **Cell culture**

Cells (including cancer cell and normal cell) were cultured in 25 cm<sup>2</sup> culture flasks in DMEM, supplemented with fetal bovine serum (10 %), penicillin (100 units per mL) and streptomycin (50 units per mL) at 37 °C in a CO<sub>2</sub> incubator (95 % relative humidity, 5 % CO<sub>2</sub>). Cells were seeded in 35 mm glass bottom cell culture dishes, at a density of  $1 \times 10^5$  cells and were allowed to grow when the cells reached more than 60 % confluence.

### **Cytotoxicity assay**

The cytotoxicity of the Ir-Biotin toward adherent cells was studied by MTT assay. HeLa cells were detached with trypsin, and seeded into 96-well plates (100 µL per well), incubated in a humidified incubator at 37°C for 24 h. Then adherent HeLa cells were treated with different concentrations of the Ir-Biotin in the growth medium at 37°C in 96-well plates. After 24 h incubation, MTT (5 mg mL<sup>-1</sup>, 10 µL) was added to each well and incubated for additional 4 h. The supernatant was then removed and 100 µL of DMSO was added to dissolve the formazan crystals. And the cell culture plate was shaken for 10 min until no particulate matter was visible. Absorbance in each well was measured at 570 nm using a microplate reader (Biotek, USA). The cell viability (%) was calculated according to the following equation: cell viability (%) =  $A/B \times 100$ , where A represents the optical density of the wells treated with various concentration of Ir-Biotin and B represents that of the wells treated with medium.

### **Mitochondrial co-localization assays**

For co-localization experiments, HeLa cells are incubated with Ir-Biotin (2 µM) for 30 min. Then the cells are treated with Mitotracker Deep Red (0.5 µM) for 20 min. At last, samples are washed three times by PBS solution and 1 mL of PBS solution is added into each well. The fluorescent images of the cells are collected by confocal laser scanning microscopy. The red fluorescence of Mito-Tracker Red is collected between 660-680 nm upon excitation at 633 nm.

---

The green fluorescence of Ir-Biotin is collected between 550-600 nm upon excitation at 405 nm. The co-localization coefficient and mean fluorescence intensity of the images are determined by the software with image J.

### **Cell uptake analysis**

QSG cells (Biotin receptor negative overexpressing cells) and HeLa cells (Biotin receptor-positive overexpressing cells) were seeded onto cell culture dishes and grown to about 70% confluency. QSG cells and HeLa cells were treated with Ir-Biotin (2  $\mu\text{M}$ ) respectively. In order to further verify the cancer-specific targeting of Ir-Biotin, HeLa cells were precultured with biotin (100  $\mu\text{M}$ , 2 h) before incubation with Ir-Biotin, and after 1 h incubation, the cellular uptake ability of Ir-Biotin were analyzed using CLSM.  $10^5$  HeLa cells and QSG cells were seeded on 35 mm confocal dishes and allowed to adhere overnight. One of the dishes of HeLa cells was pre-incubated with biotin (100  $\mu\text{M}$ ) for 2 h. Cells were then incubated with Ir-Biotin (2  $\mu\text{M}$ ) for 1 h at 37°C. After this time, the cells were detached with trypsin, harvested and centrifuged. The number of cells was accurately counted. The cell pellet was resuspended in lysis buffer and the cells were lysed. The cell organelles were separated using a ultracentrifuge the supernatant solution was separated, Each sample was the digested using a 60%  $\text{HNO}_3$  solution and was diluted to a solution of 2%  $\text{HNO}_3$  in water. The Ir content was determined using an ICP-MS apparatus and the Ir content was then associated with the number of cells.

### **ROS generation under two-photon laser *in vitro***

HeLa cells were treated with 2  $\mu\text{M}$  of Ir-Biotin in the dark. After the cells were incubated with 10  $\mu\text{M}$  of DCFH-DA at 37°C for 30 min, the cells were subjected to light irradiation (760 nm, 100  $\text{mW}/\text{cm}^2$ ). Then, confocal fluorescence imaging was performed (DCFH-DA: Ex: 488 nm, Em: 500-540 nm).

### **The species of ROS generation under two-photon laser *in vitro***

HeLa cells were incubated with 2  $\mu\text{M}$  Ir-Biotin, followed by 1  $\mu\text{M}$  singlet oxygen sensor green (SOSG) and 1  $\mu\text{M}$  dihydroethidium (DHE) for 30 minutes, respectively. Cells were washed with

---

PBS and then irradiated with 760 nm light at a power density of 100 mW/cm<sup>2</sup> for 10 minutes. Intracellular fluorescence was observed using CLSM (SOSG: Ex: 504 nm, Em:500-550 nm. DHE: Ex: 480 nm, Em: 590-630 nm).

### **Flow cytometry study**

Cells seeded into the 6-well plates were cultured for 24 h. Next, the medium was replaced with medium containing Ir-Biotin (2 μM), at 37 °C for 30 min. After irradiated by light (Concentration: 2 μM, Light: 760 nm laser, irradiation time: 5 min), the cells were incubated for another 4 h, then collected by centrifugation and resuspended in binding buffer containing Propidium Iodide (PI, 10 μL) and Annexin-V FITC (5 μL) for 15 min in darkness. The signal was collected by a BD FACS Calibur flow cytometer (Beckman/Coulter).

### **Live/Dead assay with calcein AM/PI**

Hela cells were incubated with Ir-Biotin (2 μM) for 30 min. Calcein AM and PI were used to confirm the viability of cell lines. Fluorescence images were collected by confocal laser scanning microscopy after laser irradiation.



➤ Cyclometalated ligand:

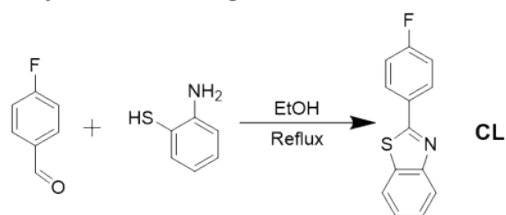

➤ Ancillary ligand:

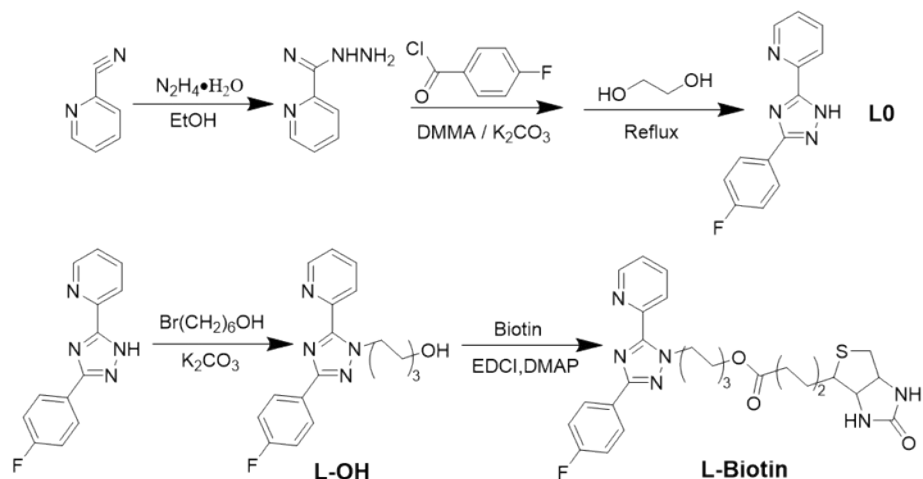

➤ Cyclometalated iridium complex:

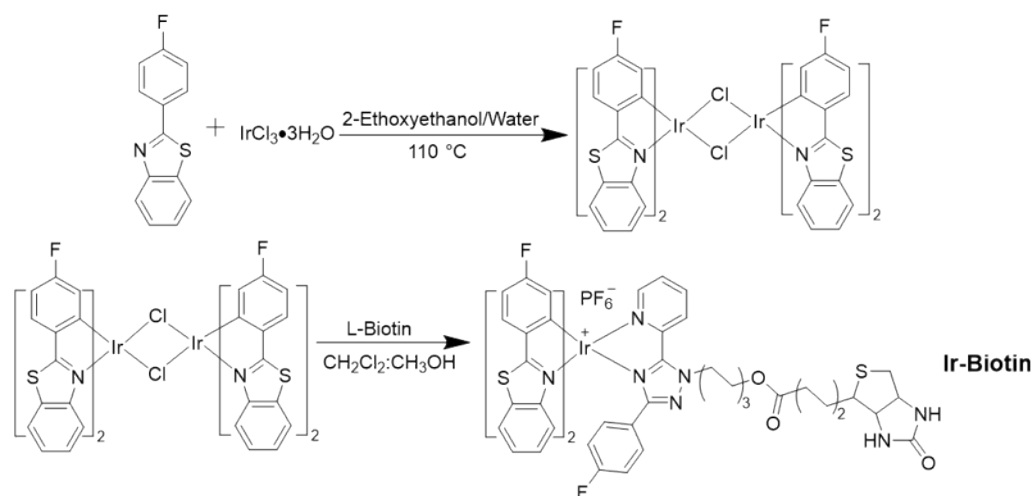

**Scheme S1.** The synthetic routes of ligand and Ir-Biotin.

### Synthesis of 2-(4-fluorophenyl)benzo[d]thiazole (CL)

The ligands were synthesis base on previous work with minor modifications. [Small 2018, 14, 1802166] 4-fluorobenzaldehyde (1.24 g, 10 mmol) and 2-aminobenzenethiol (1.25 g, 10 mmol) were dissolve in dry ethanol, then the solution was heated to reflux for 6 h. When cooled to temperature, solid was obtained by suction filtration and washed with EtOH (1 mL×3). The white solid was gained in 80% (1.83 g) yield. <sup>1</sup>H NMR (400 MHz, *d*<sub>6</sub>-DMSO) δ(ppm): 8.16 (dd, J = 8.4,

---

5.0 Hz, 3H), 8.07 (d, J = 8.2 Hz, 1H), 7.60–7.52 (m, 1H), 7.49 (d, J = 8.0 Hz, 1H), 7.47–7.39 (m, 2H). ESI-MS: m/z, [M+H]<sup>+</sup> = cal: 230.04 found: 230.04.

#### Synthesis of 2-(3-(4-fluorophenyl)-1H-1,2,4-triazol-5-yl)pyridine (L0)

L0 were synthesis according to previous work without modifications and a white crystalline compound were obtained. [Inorganic Chemistry, Vol. 46, No. 26, 2007]. <sup>1</sup>H NMR (400 MHz, *d*<sub>6</sub>-DMSO) δ(ppm): 14.86 (s, 1H), 8.73 (d, J = 4.6 Hz, 1H), 8.21 – 8.09 (m, 3H), 8.03 (dd, J = 13.6, 6.0 Hz, 1H), 7.55 (s, 1H), 7.55 (s, 1H), 7.35 (t, J = 8.6 Hz, 2H). ESI -MS: m/z, [M+H]<sup>+</sup> = cal: 241.08 found: 241.08.

#### Synthesis of 6-(3-(4-fluorophenyl)-5-(pyridin-2-yl)-1H-1,2,4-triazol-1-yl)hexan-1-ol (L-OH)

L0 (1.20 g, 5 mmol), K<sub>2</sub>CO<sub>3</sub> (3.45 g, 25 mmol) and TBAB (1.61 g, 0.5 mmol) was added MeCN (50 mL) under N<sub>2</sub> atmosphere. The mixture was stirred at 60 °C for 30 min, then 6-Bromo-1-hexanol of MeCN solution (30 mL) was added. The resultant mixture was heated to 70 °C for 6 h. when cooled the room temperature. The solvent removed and the residue separated by column chromatograph (using silica gel, R<sub>f</sub> (PE: EA=10:1) = 0.4) giving a yield of 1.19 g (70 %). <sup>1</sup>H NMR (400 MHz, CD<sub>3</sub>CN) δ(ppm): 8.85–8.72 (m, 1H), 8.40 – 8.29 (m, 1H), 8.25–8.14 (m, 2H), 8.08–7.99 (m, 1H), 7.63–7.48 (m, 1H), 7.33–7.13 (m, 2H), 4.94–4.77 (m, 2H), 3.62–3.44 (m, 2H), 3.39–3.29 (m, 1H), 1.57–1.28 (m, 8H). ESI-MS: m/z, [M+H]<sup>+</sup> = cal: 341.17 found: 341.18.

#### Synthesis of 6-(3-(4-fluorophenyl)-5-(pyridin-2-yl)-1H-1,2,4-triazol-1-yl)hexyl 5-(2-oxohexahydro-1H-thieno[3,4-d]imidazol-4-yl)pentanoate (L-Biotin)

L-Biotin were synthesis base on previous work with minor modifications[2016-Scientific RepoRts 6, 21459]. <sup>1</sup>H NMR (400 MHz, CD<sub>2</sub>Cl<sub>2</sub>) δ(ppm): 8.69 (d, J = 4.4 Hz, 1H), 8.28 (d, J = 7.9 Hz, 1H), 8.14 (dd, J = 8.0, 5.8 Hz, 2H), 7.88 (t, J = 7.7 Hz, 1H), 7.49–7.29 (m, 1H), 7.15 (t, J = 8.6 Hz, 2H), 5.25 (s, 1H), 4.97 (s, 1H), 4.84 (t, J = 7.3 Hz, 2H), 4.54–4.35 (m, 1H), 4.34–4.22 (m, 1H), 4.02 (t, J = 6.5 Hz, 2H), 3.14 (dd, J = 11.7, 7.1 Hz, 1H), 2.89 (dd, J = 12.7, 4.6 Hz, 1H), 2.68 (d, J = 12.8 Hz, 1H), 2.28 (t, J = 7.4 Hz, 2H), 1.63 (dt, J = 14.4, 7.1 Hz, 6H), 1.41 (d, J = 3.8 Hz, 6H). ESI-MS: m/z, [M+H]<sup>+</sup> = cal: 567.25 found: 567.42.

#### Synthesis of Ir-Biotin

(4-fluorophenyl)benzo[d]thiazole (0.504 g, 2.19 mmol) and IrCl<sub>3</sub>•3H<sub>2</sub>O (0.353 g, 1.00 mmol)

---

were dissolved in in 2-ethoxyethanol (15 mL) and H<sub>2</sub>O (5 mL) at a flask. subsequently, the solution in dark was refluxed for 24 h under nitrogen atmosphere, and then the solution was cooled down to room temperature. The yellow solid of [(C<sup>N</sup>)<sub>2</sub> Ir(m-Cl)<sub>2</sub>] was obtained by suction filtration and was dry in a vacuum drying oven. A mixture of [(C<sup>N</sup>)<sub>2</sub> Ir(m-Cl)<sub>2</sub>] (0.136 g, 0.0100 mmol) and L4 in CH<sub>2</sub>Cl<sub>2</sub>/CH<sub>3</sub>OH (1:1, v / v %) was refluxed under an inert condition of nitrogen for 12 h. After the reaction was finished and cooled to room temperature. The excess NH<sub>4</sub>PF<sub>6</sub> was added and stirred overnight. Then the bright yellow solid precipitates were obtained. The crude product was purified by column chromatograph (using silica gel, R<sub>f</sub> (DCM: MeOH=20:1) =0.3) giving a bright yellow solid (500 mg 37.1%). <sup>1</sup>H NMR (400 MHz, CD<sub>2</sub>Cl<sub>2</sub>) δ(ppm): δ 8.30 (dd, J = 15.7, 7.7 Hz, 2H), 8.02 (d, J = 5.0 Hz, 1H), 7.92 (d, J = 8.0 Hz, 1H), 7.84 (t, J = 8.4 Hz, 2H), 7.52 (t, J = 6.2 Hz, 1H), 7.41 (s, 1H), 7.38 – 7.27 (m, 3H), 7.20 – 6.98 (m, 4H), 6.78 (t, J = 8.6 Hz, 2H), 6.59 (t, J = 8.1 Hz, 1H), 6.46 (t, J = 8.6 Hz, 1H), 6.02 (t, J = 13.1 Hz, 1H), 5.95 (d, J = 9.2 Hz, 1H), 5.72 (d, J = 9.4 Hz, 1H), 4.71 – 4.51 (m, 2H), 4.41 (s, 1H), 4.22 (s, 1H), 3.93 (t, J = 6.1 Hz, 2H), 3.33 (d, J = 1.7 Hz, 3H), 3.09 (s, 1H), 2.83 (dd, J = 12.7, 4.7 Hz, 1H), 2.61 (d, J = 12.9 Hz, 1H), 2.24 (t, J = 7.2 Hz, 2H), 1.46 – 1.27 (m, 9H), 1.19 (d, J = 11.0 Hz, 3H), 0.87 (d, J = 56.1 Hz, 3H). <sup>13</sup>C NMR (600 MHz, d<sub>6</sub>-DMSO), δ 180.78, 180.16, 174.95, 173.44, 164.62, 164.40, 164.09, 163.30, 162.93, 162.70, 162.45, 160.09, 159.38, 156.71, 152.62, 151.52, 150.82, 149.74, 149.05, 148.13, 148.09, 144.82, 141.58, 138.33, 137.51, 137.09, 131.68, 131.61, 130.38, 129.36, 128.48, 127.00, 126.63, 126.61, 125.29, 125.23, 124.30, 123.06, 119.12, 118.78, 118.67, 116.98, 116.20, 115.42, 115.28, 111.45, 111.29, 110.45, 110.29, 110.45, 110.29, 100.00, 61.63, 61.10, 61.05, 59.77, 56.36, 55.91, 32.79, 32.69, 28.57, 28.38, 25.63, 25.36, 25.22, 25.05, 24.95. ESI-MS: m/z, [M-PF6]<sup>+</sup> = cal: 1215.27 found: 1215.50.

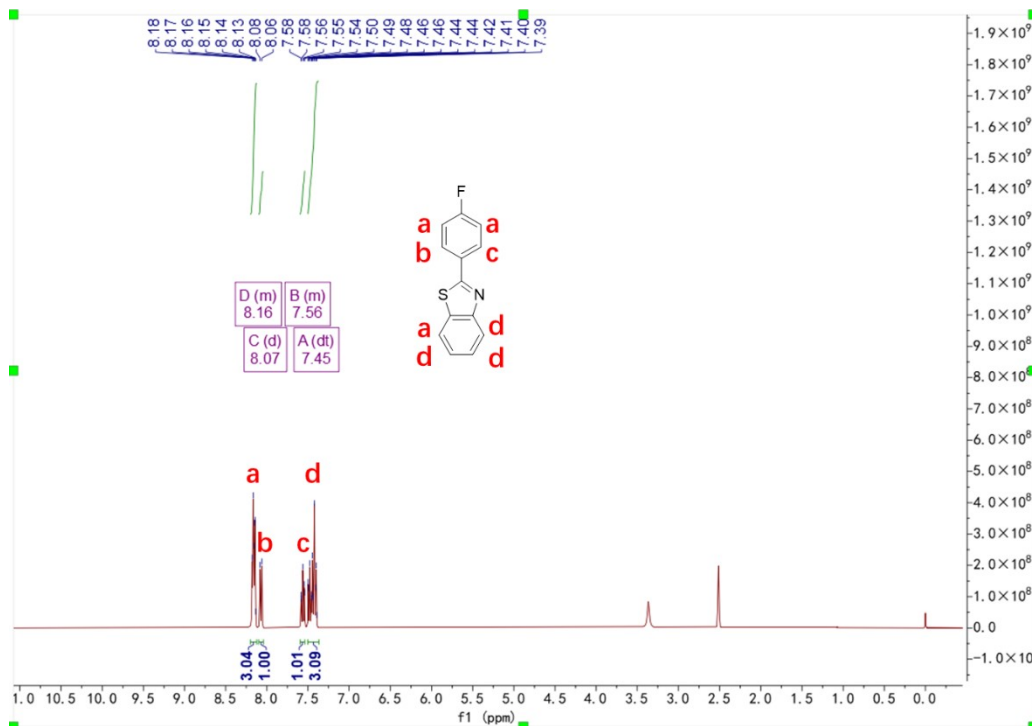

Figure S1  $^1\text{H}$  NMR spectrum (400 MHz,  $\text{DMSO-}d_6$ ) of CL.

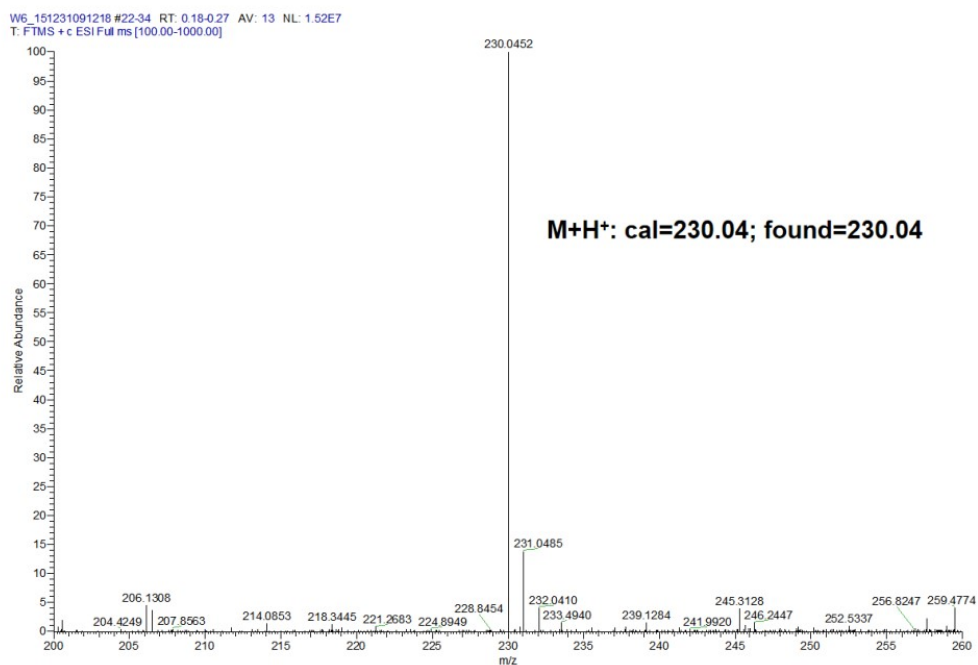

Figure S2 Mass spectrum of CL.

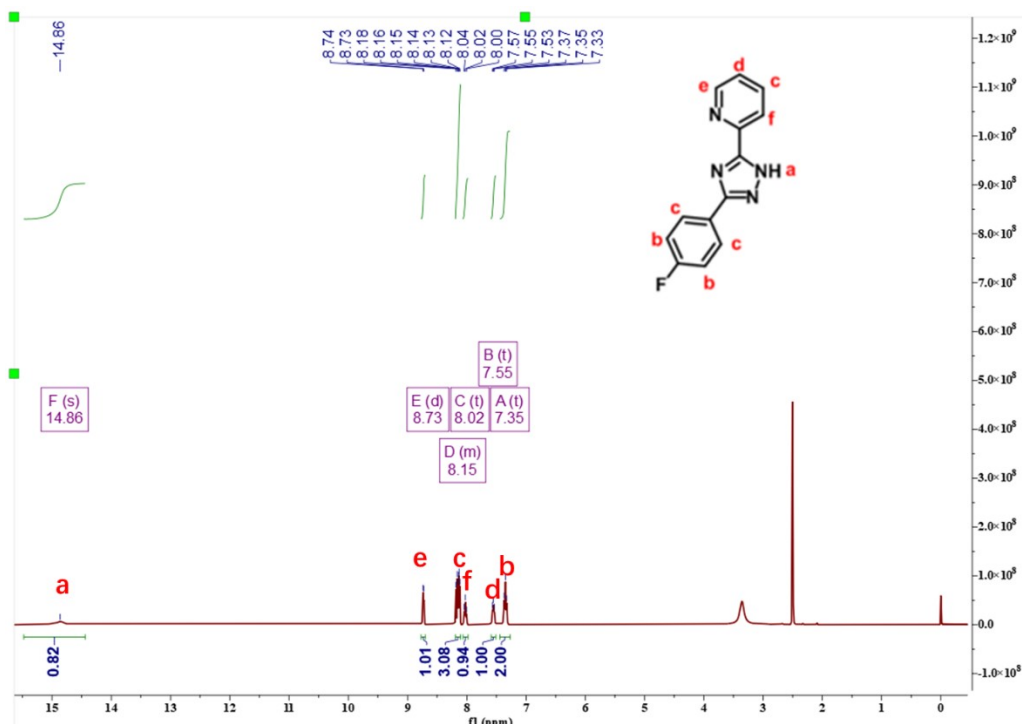

Figure S3  $^1\text{H}$  NMR spectrum (400 MHz,  $\text{DMSO-}d_6$ ) of L0.

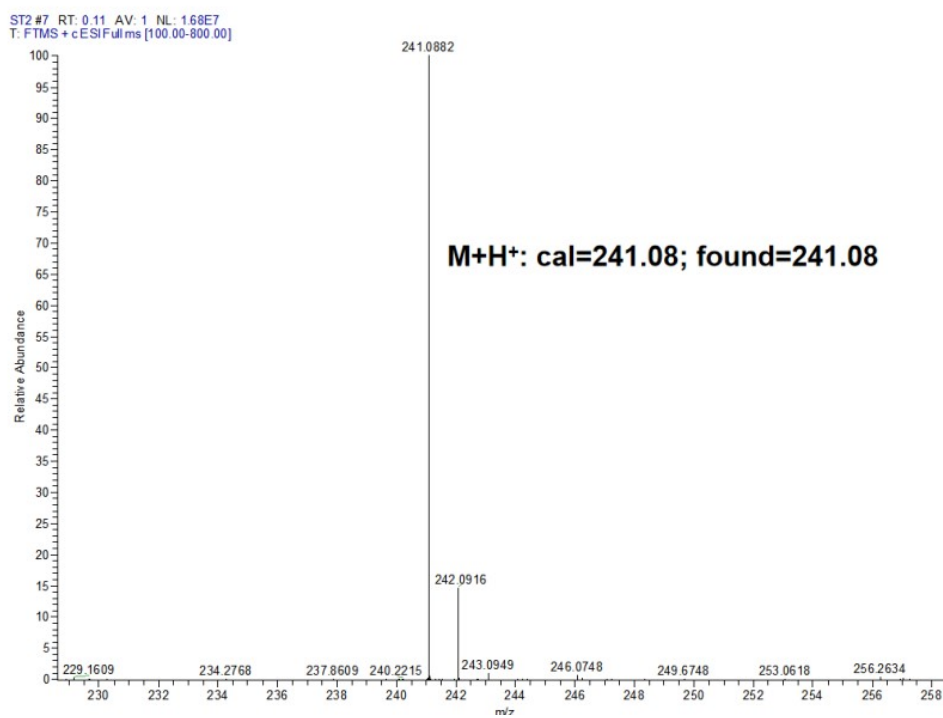

Figure S4 Mass spectrum of L0.

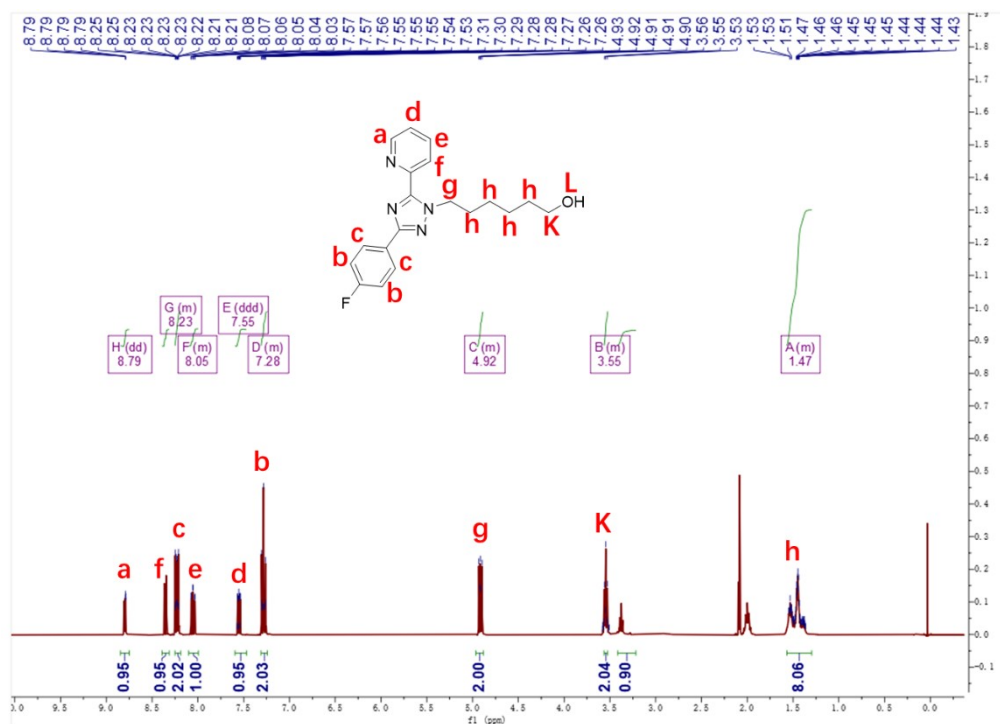

Figure S5  $^1\text{H}$  NMR spectrum (400 MHz,  $\text{CD}_3\text{CN}$ ) of L-OH.

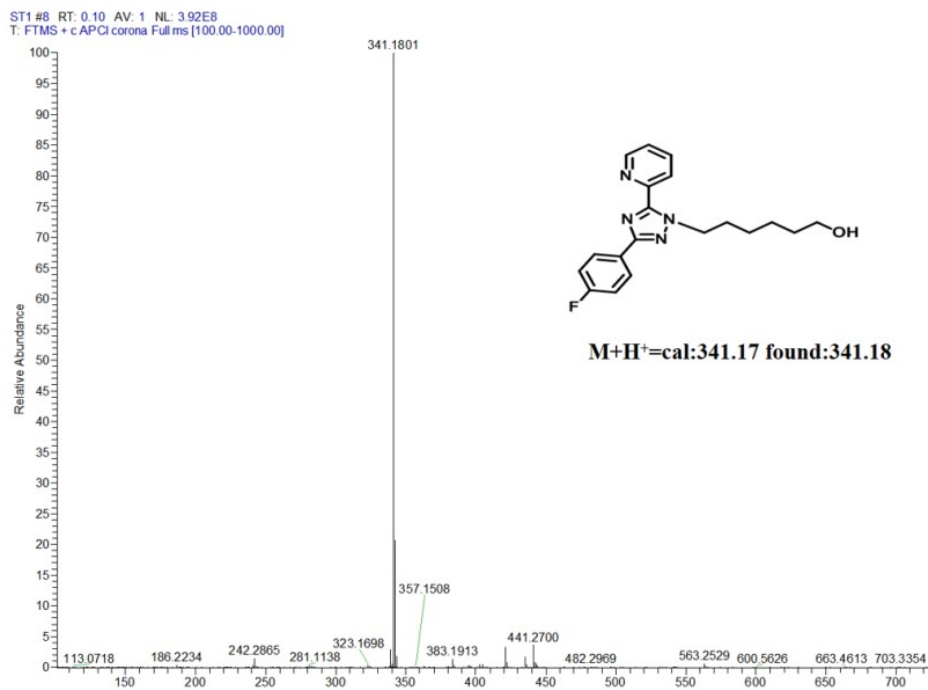

Figure S6 Mass spectrum of L-OH.

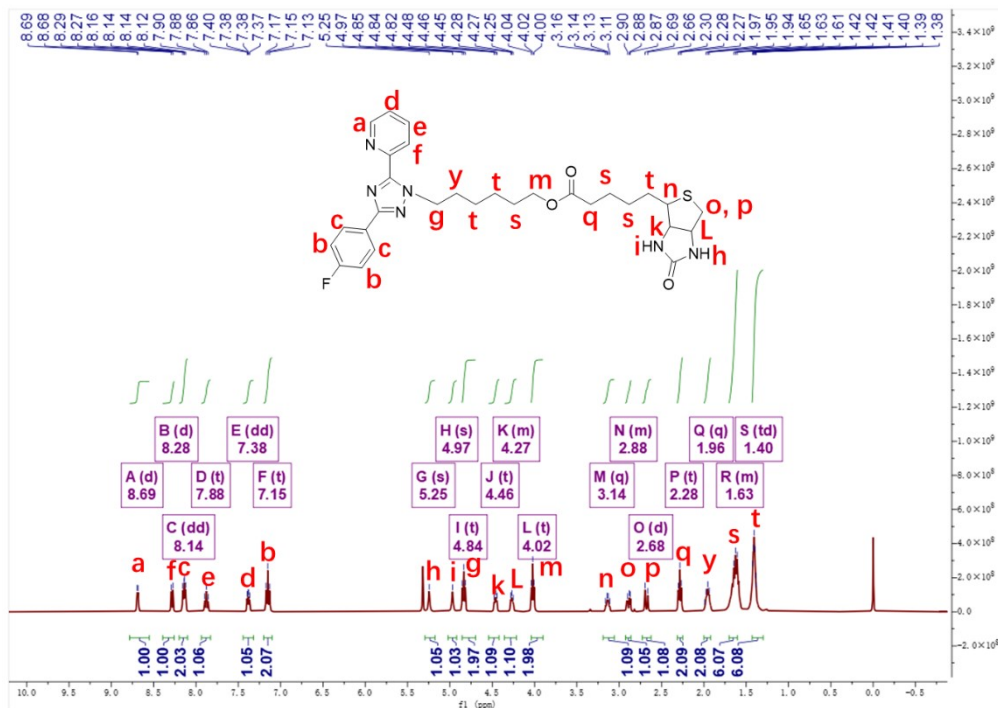

Figure S7 <sup>1</sup>H NMR spectrum (400 MHz, CD<sub>2</sub>Cl<sub>2</sub>) of L-Biotin.

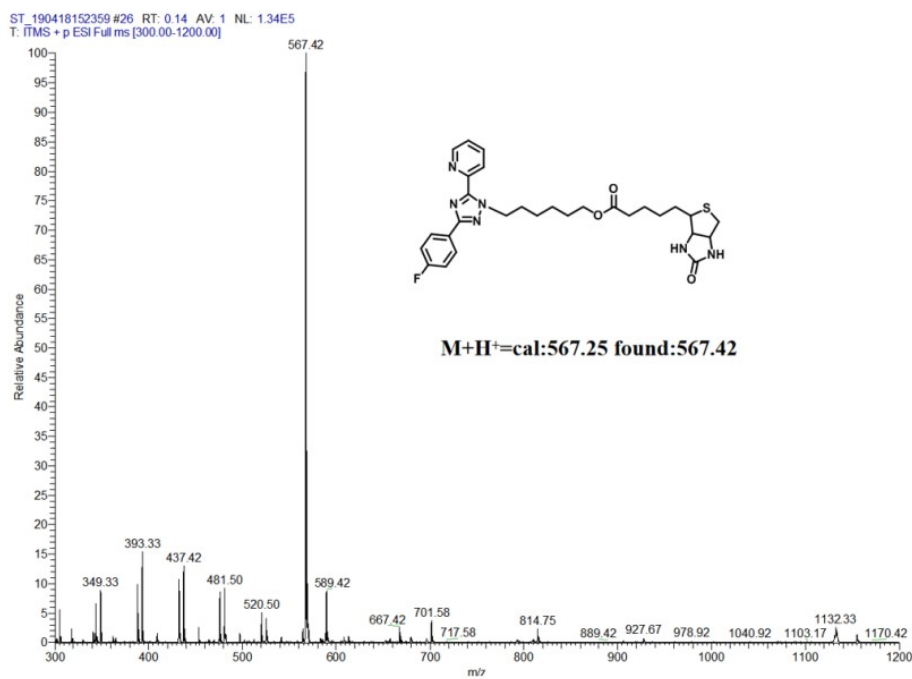

Figure S8 Mass spectrum of L-Biotin.

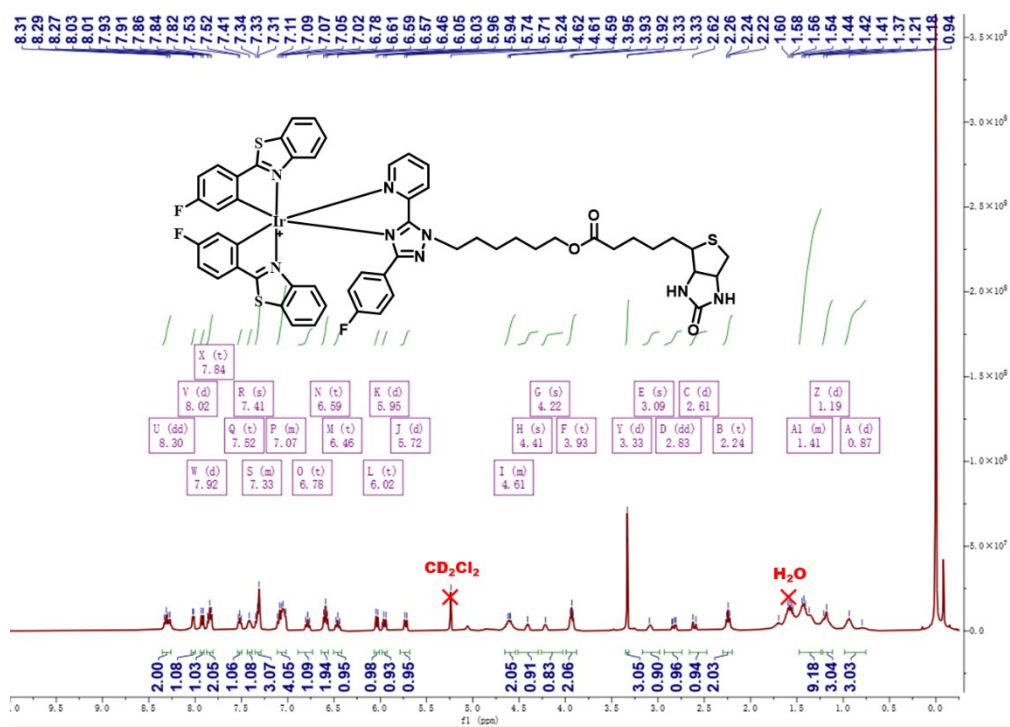

Figure S9 <sup>1</sup>H NMR spectrum (400 MHz, CD<sub>2</sub>Cl<sub>2</sub>) of Ir-Biotin.

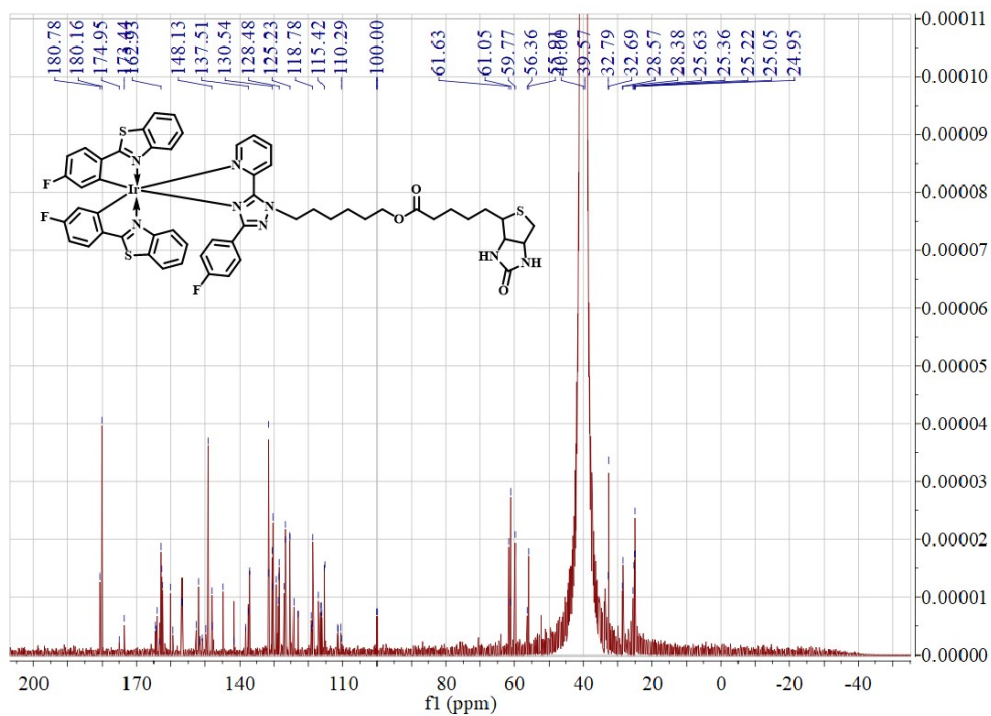

Figure S10 <sup>13</sup>C NMR spectrum (600 MHz, DMSO-*d*<sub>6</sub>) of Ir-Biotin.



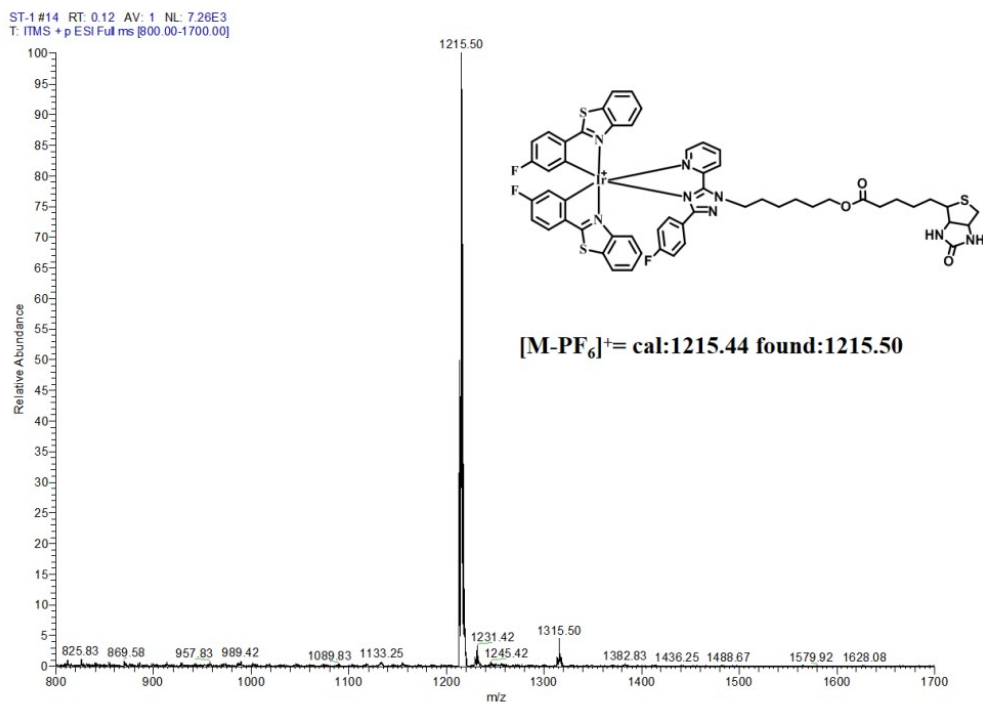

Figure S11 Mass spectrum of **Ir-Biotin**.

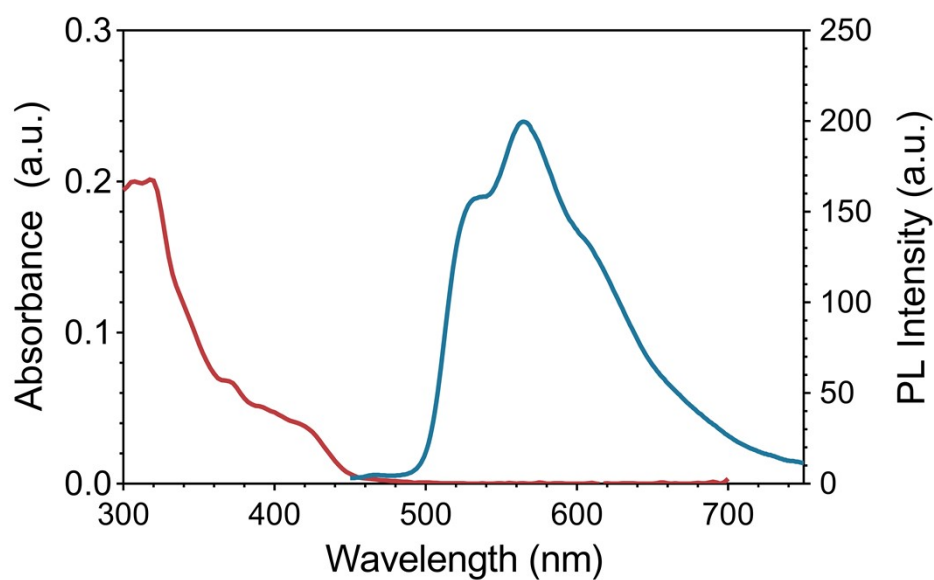

Figure S12 UV-Vis absorption and fluorescence spectra of **Ir-Biotin** in DMSO (excited at 320 nm,  $c = 1.0 \times 10^{-5}$  mol/L).

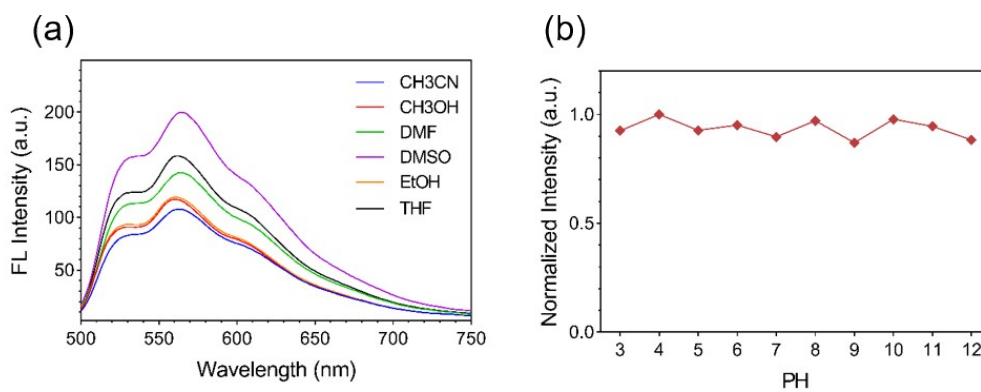

Figure S13 Effects of different solvents (a) and pH (b) on the fluorescence intensity of **Ir-Biotin**.

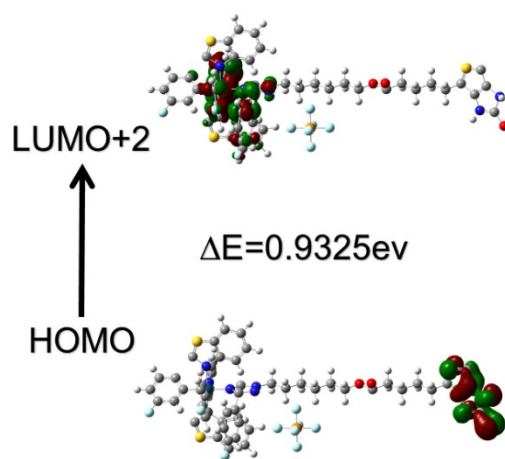

Figure S14 HOMO and LUMO distributions of **Ir-Biotin**.

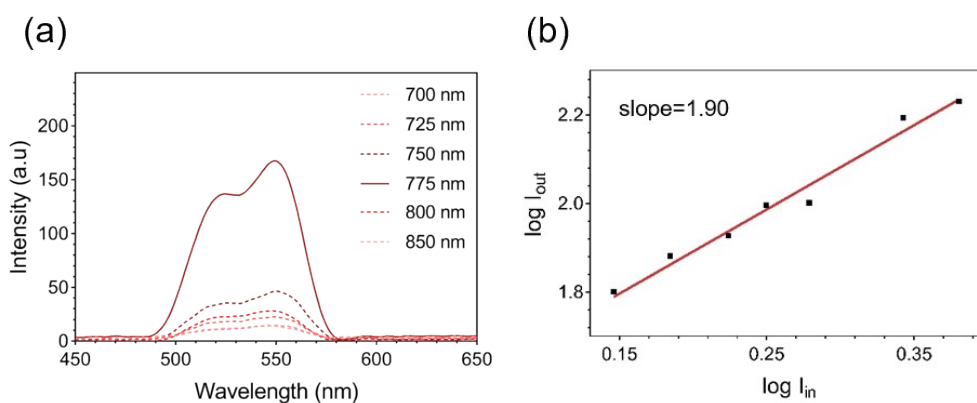

Figure S15 (a) Two-photon fluorescence intensity of **Ir-Biotin** in DMSO ( $c = 1 \times 10^{-3}$  mol/L). (b) The square relationship of two-photon excited fluorescence intensity ( $I_{out}$ ) of **Ir-Biotin** with the addition of input power.

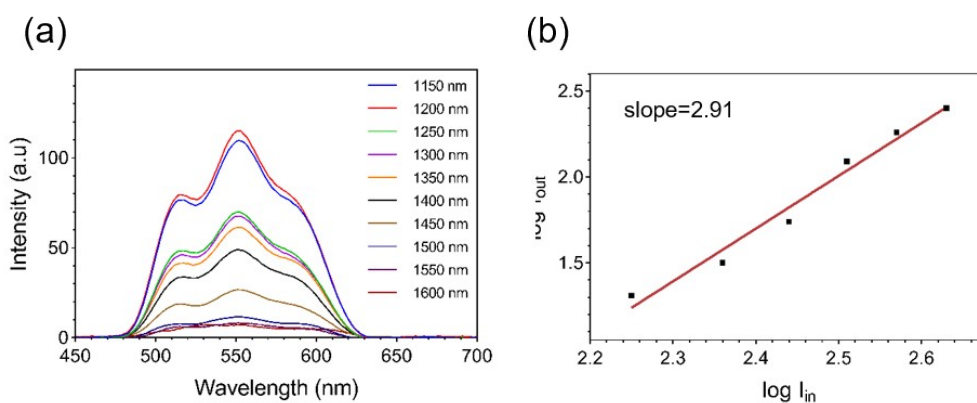

Figure S16 (a) Three-photon fluorescence intensity of **Ir-Biotin** in DMSO ( $c = 1 \times 10^{-3}$  mol/L). (b) The square relationship of three-photon excited fluorescence intensity ( $I_{out}$ ) of **Ir-Biotin** with the addition of input power.

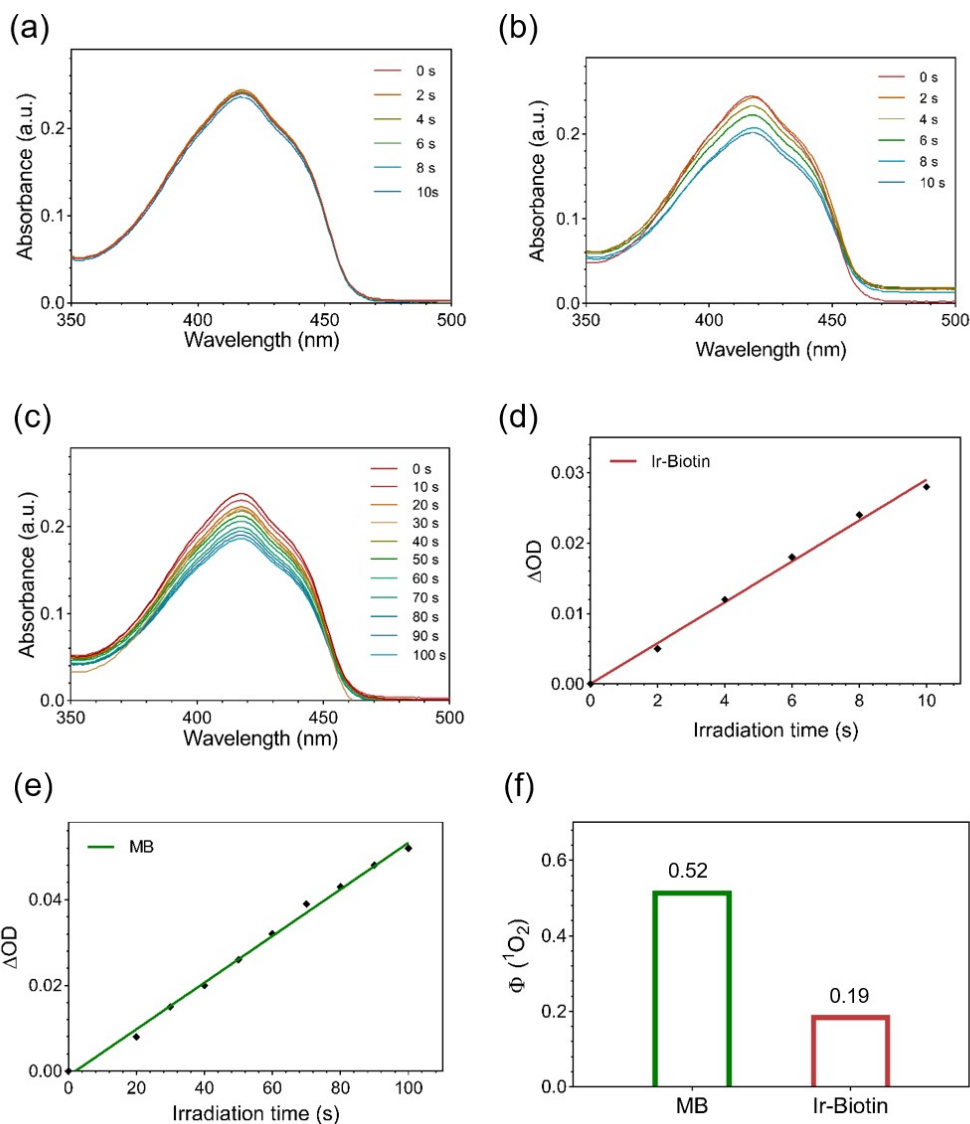

Figure S17 (a) Changes in the DPBF absorption spectrum after 10 s of irradiation. (b) Absorption spectra of DPBF irradiated for 10 s in the presence of **Ir-Biotin**. (c) Absorption spectra of DPBF irradiated for 100 s in the presence of MB. Plot of change in absorbance of DPBF at 418 nm vs irradiation time in the presence of **Ir-Biotin** (d) and MB (e). (f) Singlet oxygen quantum yields of MB and **Ir-Biotin**.

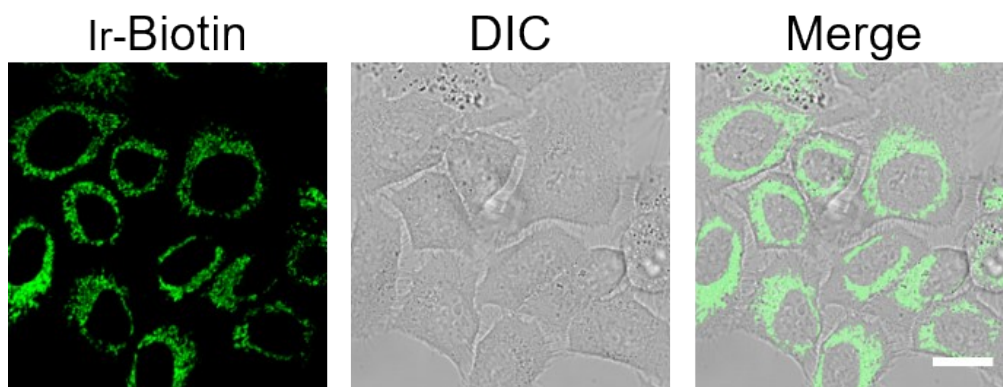

Figure S18 CLSM images of HeLa cells treated with **Ir-Biotin** (Concentration: 2  $\mu$ M. Scale bar: 20  $\mu$ m).

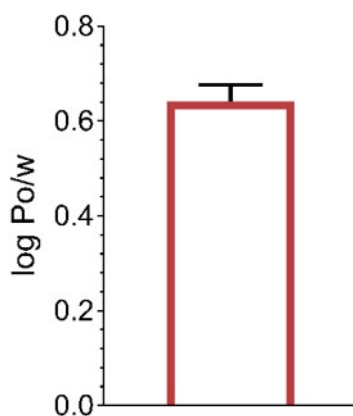

Figure S19 Octanol/water partition coefficient of **Ir-Biotin**.

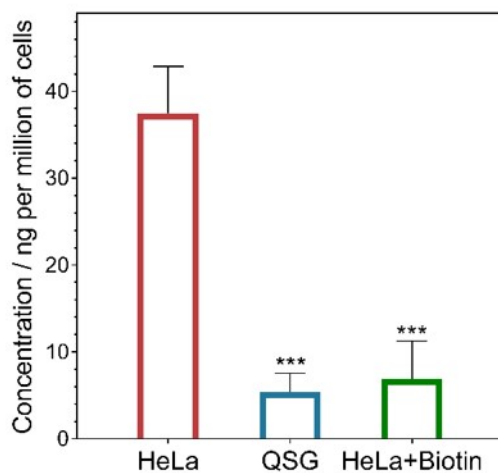

Figure S20 Comparison of **Ir-Biotin** uptake in HeLa cells and QSG cells. (\*P < 0.05, \*\*P < 0.01, \*\*\*P < 0.001 determined by One-way ANOVA).

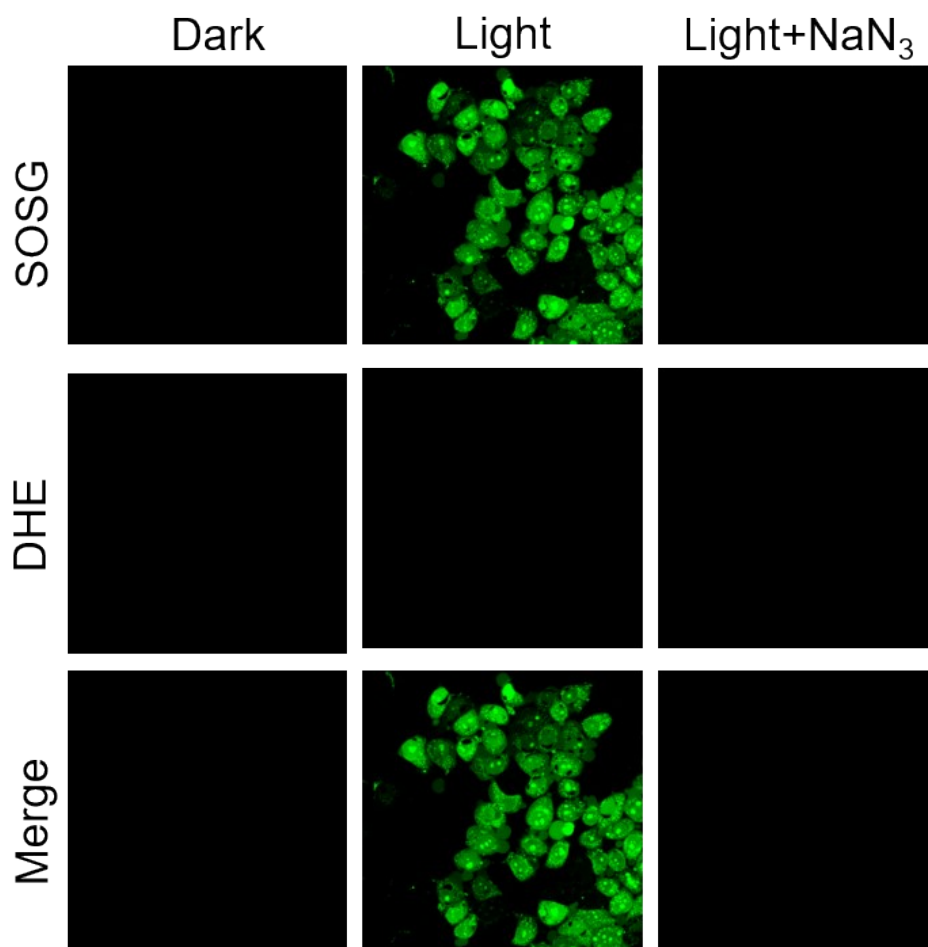

Figure S21 Detection of ROS species in HeLa cells using DHE and SOSG as indicators for O<sub>2</sub><sup>•-</sup> and <sup>1</sup>O<sub>2</sub>. NaN<sub>3</sub> acts as a specific scavenger for <sup>1</sup>O<sub>2</sub> (Concentration: 2 μM. Light: 760 nm laser. irradiation time: 10 min Scale bar: 40 μm).

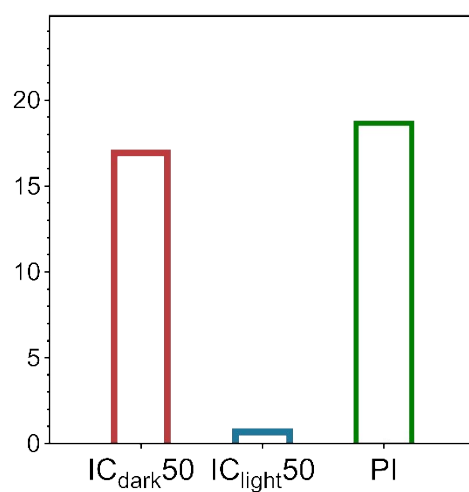

Figure S22 IC<sub>50</sub> value and phototoxicity index (PI) of **Ir-Biotin** under light and dark.

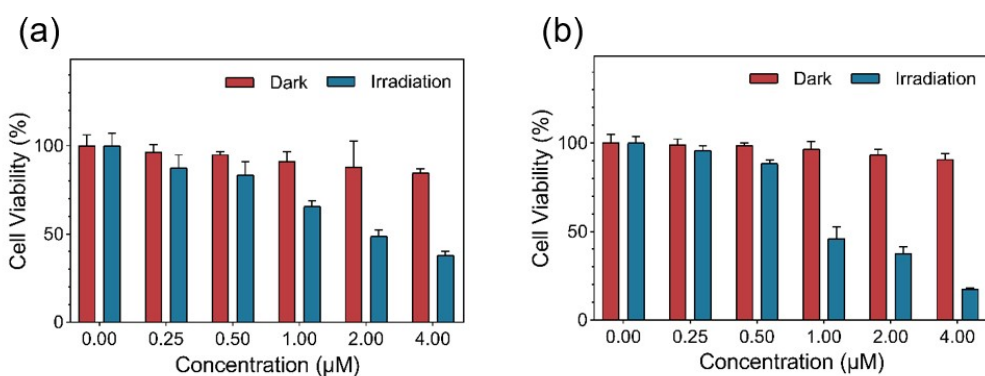

Figure S23 Detection dark toxicity and phototoxicity of **Ir-Biotin** against HepG2 (a) and 4T1 (b) cells.

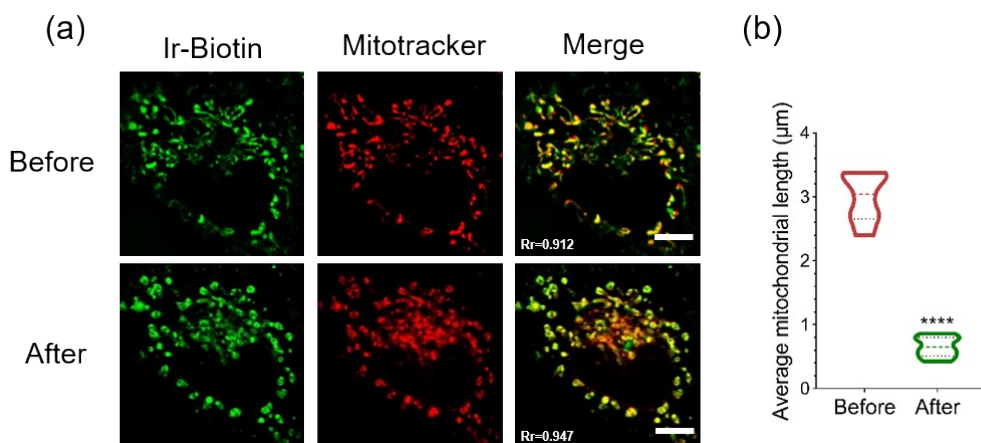

Figure S24 Laser irradiation 30 S mitochondrial length change (a) and quantization (b) (Concentration: 2 µM. Light: 760 nm laser. Scale bar: 10 µm. \* $P < 0.05$ , \*\* $P < 0.01$ , \*\*\* $P < 0.001$  determined by Student's t-test).
